# Supplementary material for: Identification of a Novel Conjugative Plasmid in Mycobacteria That Requires Both Type IV and Type VII Secretion
Source: PubMed Central journal article supplement — mBio. 2014 Sep 23;5(5):e01744-14. doi: 10.1128/mBio.01744-14 (PMC4173767; doi:10.1128/mbio.01744-14), 2014-09-23
Supplement: mbo005142005st2.pdf [file mbo005142005st2.pdf]

**Table S2** Primers used for various purposes in this study

| target                             | sequence (5'→ 3')               |
|------------------------------------|---------------------------------|
| <b>M-strain specific:</b>          |                                 |
| <i>mmar_3798</i> forward           | TGGAAGATATCGGGAACTGC            |
| <i>mmar_3798</i> reverse           | TTAGCGGCGAAAGACTTGAT            |
| <i>kdpC</i> forward                | TGCCGCAGTACTTCCAGAG             |
| <i>kdpC</i> reverse                | ACGCCTTGAAAGACATCCAG            |
| <b>E11-strain specific</b>         |                                 |
| <i>mmarE11_00270</i> forward       | TGCACGAATTGCTCTTCAAC            |
| <i>mmarE11_00270</i> reverse       | ACGACATGCTGACGTACTCG            |
| <i>mmarE11_28790</i> forward       | CAAGCTCACAACCGTGAAAA            |
| <i>mmarE11_28790</i> reverse       | CGAATATCGCCAAACCTGAT            |
| <b>pRAW-specific primers</b>       |                                 |
| <i>virB4</i> homologue forward     | GGCATAGGATTTGCCGTATC            |
| <i>virB4</i> homologue reverse     | AGCTTGAAGCCAACATCGAC            |
| relaxase forward                   | CTACCGCGACTACAACACCA            |
| relaxase reverse                   | GGGGTGAACGTGAGGTCATA            |
| <i>eccC<sub>p1</sub></i> forward   | TGCGRCTGGTGGTGGTACT             |
| <i>eccC<sub>p1</sub></i> reverse   | GGCGAACTCGTCAATGACCA            |
| <i>eccA<sub>p1</sub></i> forward   | CACCCAAGCGATGTGYCTTC            |
| <i>eccA<sub>p1</sub></i> reverse   | GCCATCAGCTTGGTCAGTTC            |
| <b>primers for complementation</b> |                                 |
| <i>eccBC6</i> AflIII forward       | TTTTTCTTAAGGCAACGGCGCAGAACCGATT |
| <i>eccBC6</i> HindIII reverse      | TTTTTAAGCTTCGTAGCCGCTCTGAAGGACA |
| <i>eccC6</i> AflIII forward        | TTTTTCTTAAGGCAGACCGAACGCGTCTATC |
| <i>virb4</i> -like HindIII forward | TTTAAGCTTATGAGCCAGACCGTGGTGAG   |
| <i>virb4</i> -like PacI reverse    | TTTTTAATTAAGCATCACGACCGCCAATTC  |

The introduced restriction sites in the primers used for complementation are shown in italics. pRAW-specific primers contain two ambiguity bases to increase detection (based on pMyong sequence homology).
